# Supplementary material
Source: publisher site journal article supplement (https://www.dovepress.com/article/570903)
Supplement: Supplementary file 1 [file 570903%20supplementary%20file.docx]

*Supporting Information*

**List of Abbreviations**

| Abbreviation | Definition |
| --- | --- |
| ABTS | 2,2'-azino-bis(3-ethylbenzthiazoline-6-sulfonic acid) |
| ALT | alanine transaminase |
| ALP | alkaline phosphatase |
| AST | aspartate transaminase |
| AUC | area under the curve |
| BUN | urea nitrogen |
| C6 | Coumarin-6 |
| C6-bNE | C6 loaded bNE |
| Cmax | maximum drug concentration |
| CL | clearance |
| CRE | creatinine |
| DAS | Drug and Statistics |
| DCM | dichloromethane |
| DDS | drug delivery systems |
| DHE | dihydroethidium |
| DiR | DiIC18(7) |
| DiR-bNE | DiR-labeled bNE |
| DLE | drug loading efficiency |
| DLS | dynamic light scattering |
| DMY | dihydromyricetin |
| DMY-bNE | high DMY-loaded biomimetic nanoemulsion |
| EE | encapsulation efficiency |
| FA | formic acid |
| FDA | Food and Drug Administration |
| GMO | glyceryl monooleate |
| GMP | glycerol monopalmitate |
| GMS | glyceryl monostearate |
| GPX4 | glutathione peroxidase 4 |
| GSH | reduced glutathione |
| HDL | high-density lipoprotein |
| H&E | hematoxylin and eosin |
| HFD | high fat diet |
| HO-1 | Heme Oxygenase 1 |
| HPLC | high-performance liquid chromatography |
| LCN2 | lipocalin 2 |
| LDH | lactate dehydrogenase |
| LDL | low-density lipoprotein |
| LPO | lipid peroxide |
| MAG | monoacylglyceride |
| MDA | malondialdehyde |
| MET | metformin hydrochloride |
| MRT | mean retention time |
| NAFLD | nonalcoholic fatty liver disease |
| NASH | nonalcoholic steatohepatitis |
| NCD | normal chow diet |
| NO | nitric oxide |
| Nrf2 | Nuclear factor erythroid 2-related factor 2 |
| O.D. | optical density |
| ORO | Oil Red O |
| ROS | reactive oxygen species |
| SD | standard deviation |
| SPF | specific pathogen-free |
| t1/2 | half-life |
| TC | total cholesterol |
| TEM | transmission electron microscopy |
| TG | triglycerides |
| Tmax | maximum drug concentration time |
| TRF | transferrin |
| V | apparent volume of distribution |

**Supplementary Figures and Tables**


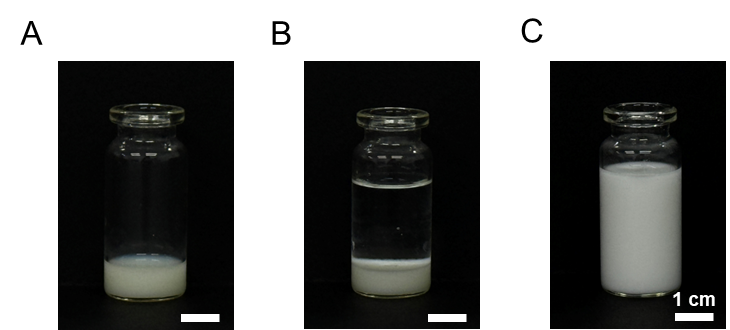


**Figure S1**. Images of DMY-bNE preparation process. (A) primary emulsion, (B) oil phase and water phase before secondary emulsification, and (C) secondary emulsion. Scale bars represent 1 cm (white).


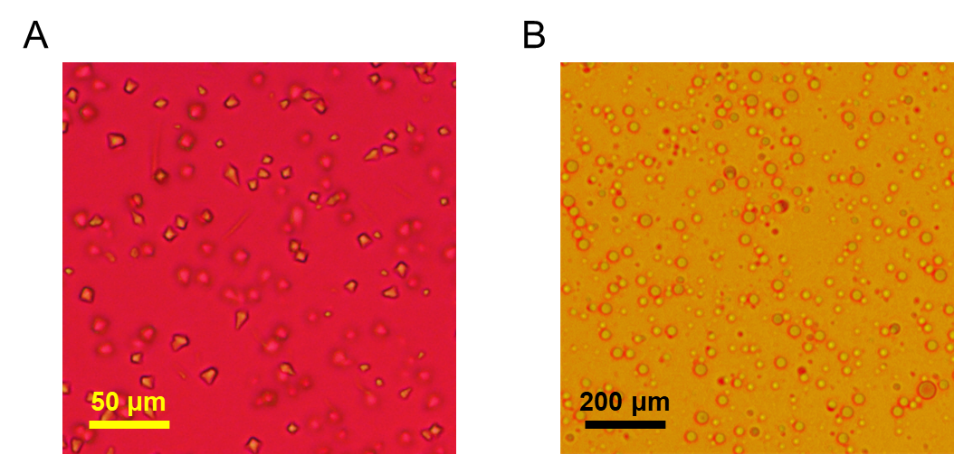


**Figure S2**. Representative Sudan III-stained images of (A) primary emulsion and (B) secondary emulsion. Scale bars represent 50 μm (yellow) and 200 μm (black).


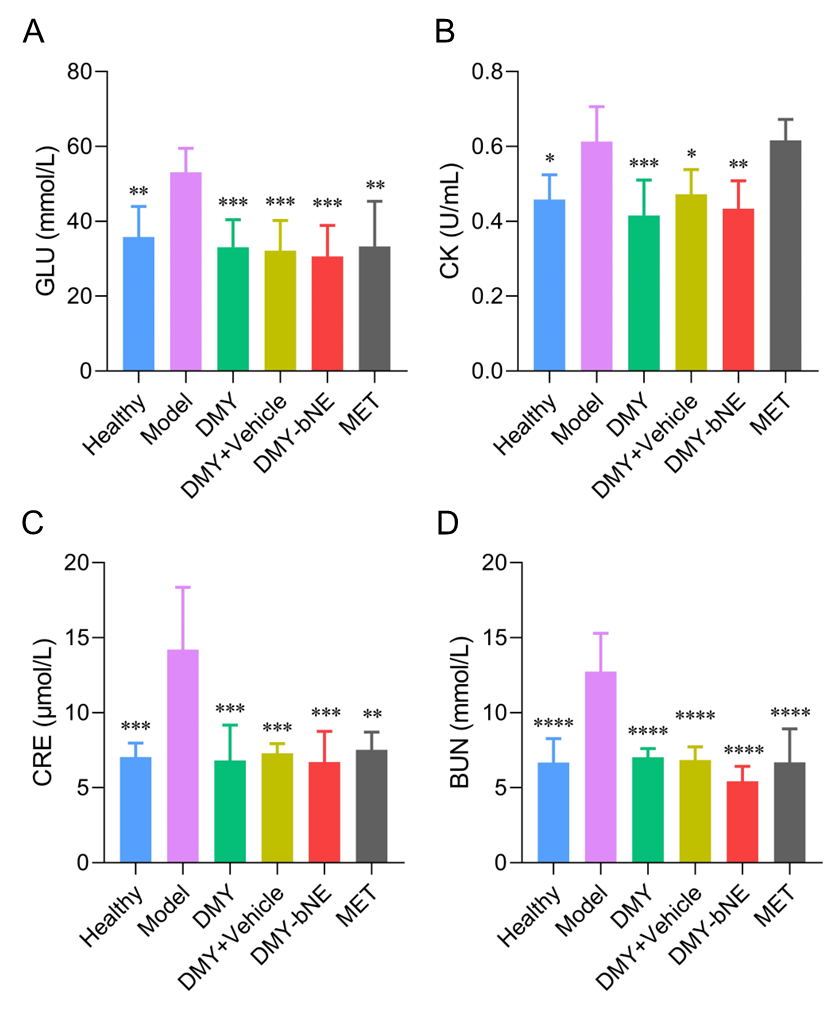


**Figure S3**. Plasma (A) glucose, (B) CK, (C) CRE and (D) BUN levels of healthy mice and NAFLD mice orally administrated with water (placebo), free DMY, DMY + vehicle, DMY-bNE and MET at the dose of 25 mg DMY/kg or 250 mg MET/kg for 6 weeks, respectively (n =8). Statistical analysis was performed using One-Way ANOVA. * p < 0.05, ** p < 0.01, *** p < 0.001, **** p < 0.0001, *vs* group Model.


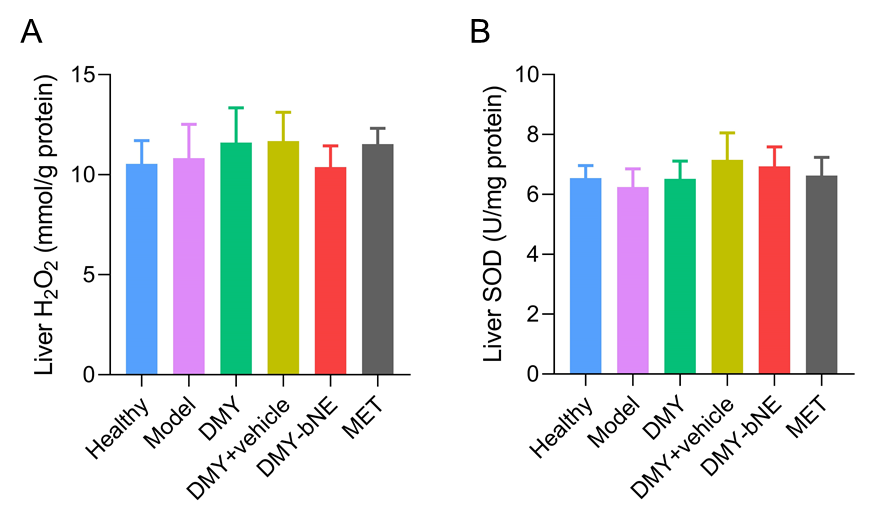


**Figure S4**. Liver (A) H2O2 and (B) SOD levels of healthy mice and NAFLD mice orally administrated with water (placebo), free DMY, DMY + vehicle, DMY-bNE and MET at the dose of 25 mg DMY/kg or 250 mg MET/kg for 6 weeks, respectively (n = 8).

**Table S1**. Preparation and characterization of DMY-bNE using different MAGs. The hydrodynamic diameters were measured using DLS (n = 5), and the EEs were determined by HPLC.

| MAGs | DMY (mg) | Acetone (mL) | DCM (mL) | Primary emulsion W/O ratio | Water (mL) | Secondary emulsion O/W ratio | Diameter (nm) | EE (%) |
| --- | --- | --- | --- | --- | --- | --- | --- | --- |
| 100 mg GMO | 40 | 0.3 | 5 | 1:16.7 | 30 | 1:6 | 190.4 ± 3.3 | 99.5 |
| 100 mg GMS | 40 | 0.3 | 5 | 1:16.7 | 30 | 1:6 | 383.8 ± 4.1 | 85.2 |
| 100 mg GMP | 40 | 0.3 | 5 | 1:16.7 | 30 | 1:6 | 344.7 ± 2.5 | 88.9 |

**Table S2**. Fitting results of *in vitro* release profiles.

| Models | Groups | Regression Equations | R2 |
| --- | --- | --- | --- |
| Zero-order | DMY pH1.2 | *y* = 4.5*x* + 37.6 | 0.557 |
| DMY pH6.8 | *y* = 4.0*x* + 43.7 | 0.478 |
| DMY-bNE pH1.2 | *y* = 4.1*x* + 65.9 | 0.310 |
| DMY-bNE pH6.8 | *y* = 4.1*x* + 67.2 | 0.311 |
| First-order | DMY pH1.2 | *y* = 71.4 × (1 - e-1.26*x*) | 0.972 |
| DMY pH6.8 | *y* = 73.3 × (1 - e-1.55*x*) | 0.970 |
| DMY-bNE pH1.2 | *y* = 96.4 × (1 - e-2.37*x*) | 0.990 |
| DMY-bNE pH6.8 | *y* = 98.4 × (1 - e-2.32*x*) | 0.984 |
| Higuchi | DMY pH1.2 | *y* = 19.5*x*1/2 + 22.4 | 0.791 |
| DMY pH6.8 | *y* = 17.7*x*1/2 + 29.6 | 0.721 |
| DMY-bNE pH1.2 | *y* = 18.9*x*1/2 + 50.1 | 0.548 |
| DMY-bNE pH6.8 | *y* = 19.2*x*1/2 + 51.1 | 0.551 |

**Method Validation of DMY Quantification**

DMY was quantitatively determined by HPLC (Waters e2695, USA) equipped with an ultraviolet detector and a reverse phase C18 column (250×4.6 mm, 5 μm). The mobile phases consisted of (A) methanol and (B) 0.1% phosphoric acid in water (v/v) at the ratio of A:B = 32:68 (v/v). The flow rate, column temperature, injection volume and detection wavelength were 1 mL/min, 30℃, 10 μL and 290 nm, respectively. The analytical method was validated for system suitability, selectivity, linearity, range, sensitivity, accuracy, precision, solution stability, and robustness according to ICH Q2 guidelines.

*System suitability and selectivity*


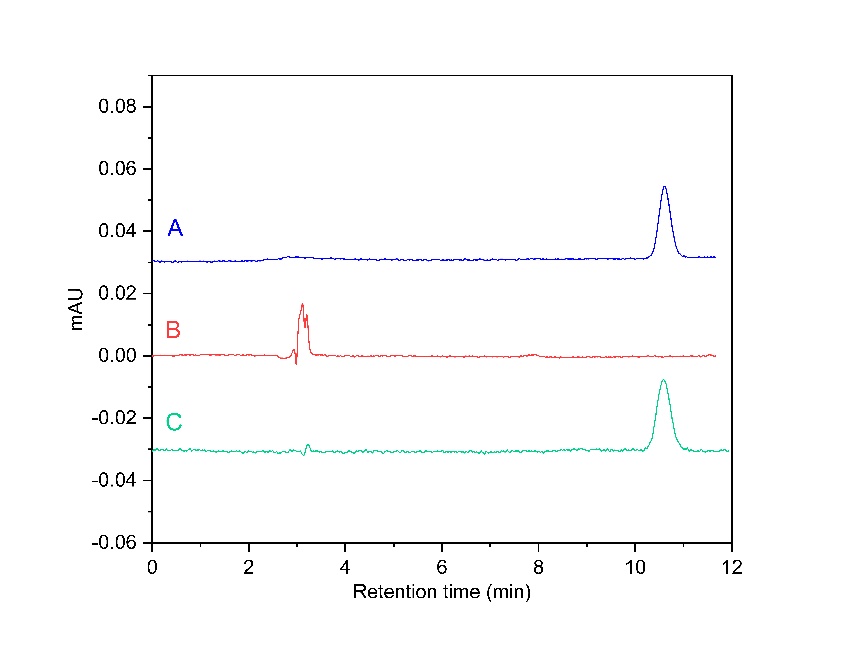


**Figure S5**. Representative HPLC chromatograms of specificity test of (A) DMY standard solution, (B) blank excipient solution and (C) matrix-matched sample solution.

*Linearity, range and sensitivity*


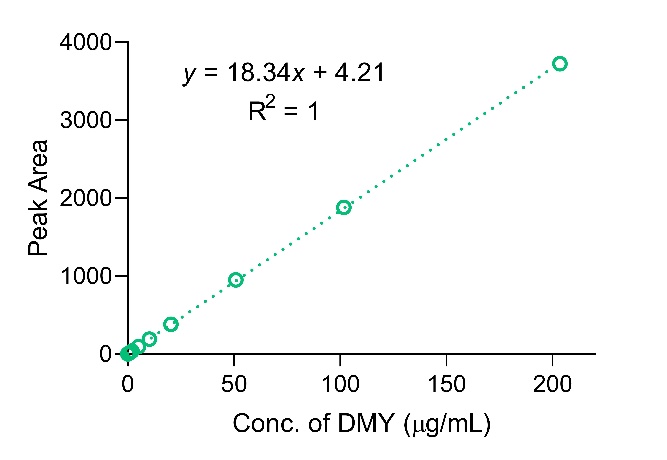


**Figure S6**. Standard curve of DMY.

**Table S3**. Linearity, range, LOD and LOQ of the analytical method.

| Compound | Calibration range (μg/mL) | Linear regression equation | R2 | LOD (μg/mL) | LOQ (μg/mL) |
| --- | --- | --- | --- | --- | --- |
| DMY | 0.1~203 | *y* = 18.34*x* + 4.21 | 1 | 0.01 | 0.02 |

*Accuracy and precision*

**Table S4**. Results of accuracy

| Groups | Sample Conc. (μg/mL) | Determination Conc. (μg/mL) | Recovery (%) | RSD (%) |
| --- | --- | --- | --- | --- |
| Low | 81.4 | 81.8 | 100.6 | 0.02 |
| 81.8 | 100.6 |
| 81.9 | 100.6 |
| Middle | 101.7 | 102.3 | 100.6 | 0.02 |
| 102.4 | 100.7 |
| 102.4 | 100.7 |
| High | 122.0 | 122.9 | 100.7 | 0.01 |
| 122.9 | 100.7 |
| 122.9 | 100.7 |

**Table S5.** Results of precision and intermediate precision

| Sample Conc. (μg/mL) | Area1 | RSD1 (%) | Area2 | RSD2 (%) |
| --- | --- | --- | --- | --- |
| 101.7 | 1881.9 | 0.03 | 1876.1 | 0.03 |
| 1881.8 | 1877.2 |
| 1881.2 | 1876.6 |
| 1880.5 | 1877.7 |
| 1880.8 | 1876.0 |
| 1881.2 | 1877.3 |
| RSD12 (%) | 0.12 | | | |

*Solution stability*

**Table S6**. Results of solution stability.

| Time (h) | Area | RSD (%) |
| --- | --- | --- |
| 0 | 1881.9 | 0.02 |
| 2 | 1881.6 |
| 4 | 1881.5 |
| 8 | 1881.1 |
| 12 | 1880.7 |
| 24 | 1881.0 |

*Robustness*

**Table S7**. Results of robustness.

| Variations | | Area | RSD (%) |
| --- | --- | --- | --- |
| Component ratio of mobile phase (A:B, v:v) | 30:70 | 1881.2 | 0.01 |
| 32:68 | 1881.4 |
| 34:66 | 1881.8 |
| Flow rate (mL/min) | 0.98 | 1881.9 | 0.01 |
| 1.00 | 1881.4 |
| 1.02 | 1881.8 |
| Column temperature (℃) | 28 | 1881.0 | 0.02 |
| 30 | 1881.4 |
| 32 | 1880.5 |
